# Supplementary material for: Different Types of Chronic Inflammation Engender Distinctive Immunosenescent Profiles in Affected Patients
Source: MDPI journal article supplement (doi:10.3390/ijms232314688), 2022-11-24
Supplement: s1 [file s1]

**Suppl Table S1. Current immunosuppressive treatment in SLE patients**

| SLE patients                               |         |            |
|--------------------------------------------|---------|------------|
| <i>Current Immunosuppressive treatment</i> | N(%)    | Time (mo)  |
| Hydroxychloroquin                          | 30(100) | 84(45-125) |
| Steroids                                   | 24(80)  | 78(45-92)  |
| MMF                                        | 20(67)  | 53(37-65)  |
| CNIs                                       | 12(40)  | 42(28-56)  |

**Suppl Table S2. B Lymphocytes and subpopulations in SLE and ESKD-HD female patients and female HC**

|                          | SLE                | ESKD-HD       | HC             | p        | p          |                | p               |
|--------------------------|--------------------|---------------|----------------|----------|------------|----------------|-----------------|
| n                        | 29                 | 19            | 17             | KW test* | SLE vs. HC | ESKD-HD vs. HC | SLE vs. ESKD-HD |
| CD19%                    | 5.8(2.1-28.6)      | 6.9(4.6-21)   | 10.2(5.4-24)   | NS       |            |                |                 |
| CD19 cells/ $\mu$ L      | 72.8(14.4-520.8)   | 97(46-279)    | 186(84-502)    | 0.003    | 0.002      | NS             | NS              |
| IgD+CD27-%               | 51.5 (0.4-94)      | 69.9(45-90)   | 55(27.8-81.5)  | 0.04     | NS         | NS             | 0.02            |
| IgD+CD27-cells/ $\mu$ L  | 37.07(0.26-435)    | 79(27-203)    | 105(46-317)    | 0.01     | 0.01       | NS             | NS              |
| IgD+ CD27+%              | 5(0.2-22.5)        | 6.5(1.3-30.9) | 10.4(3-44)     | 0.028    | 0.02       | NS             | NS              |
| IgD+CD27+ cells/ $\mu$ L | 5.1(0.13-17.55)    | 8(2-31)       | 17(5-147)      | <0.001   | <0.001     | 0.01           | NS              |
| IgD-CD27+%               | 19.2(2.2-78)       | 16(3.1-28.4)  | 17.2(7.7-39.7) | NS       |            |                |                 |
| IgD-CD27+ cells/ $\mu$ L | 18.44(0.47-89.58)  | 16(4-66)      | 28(11-148)     | 0.006    | 0.03       | 0.006          | NS              |
| IgD-CD27-%               | 11.75(2.3-74.2)    | 6.4(3-19.8)   | 91(4.7-26.5)   | 0.006    | NS         | NS             | 0.004           |
| IgD-CD27-cells/ $\mu$ L  | 10.64(0.93-122.91) | 7(3-35)       | 19(7-62)       | 0.003    | NS         | 0.002          | NS              |

\*Kruskal-Wallis test and Dunn test was performed to estimate differences between two groups, SLE vs. HC, ESKD-HD vs. HC and SLE vs. ESKD-HD

**Suppl Table S3. CD4 Lymphocytes and subpopulations in SLE and ESKD-HD female patients and female HC**

|                                                       | SLE             | ESKD-HD         | HC              | p        | p          | p              | p               |
|-------------------------------------------------------|-----------------|-----------------|-----------------|----------|------------|----------------|-----------------|
| n                                                     | 29              | 19              | 17              | KW test* | SLE vs. HC | ESKD-HD vs. HC | SLE vs. ESKD-HD |
| CD4%                                                  | 49.6(21.6-71.8) | 49.8(32.1-63.3) | 53.6(36.1-70.4) | NS       |            |                |                 |
| CD4 cells/ $\mu$ L                                    | 637(71.1-1478)  | 679(371-1329)   | 981(442-1591)   | 0.014    | 0.018      | 0.047          | NS              |
| <b><u>Early differentiated cells</u></b>              |                 |                 |                 |          |            |                |                 |
| CD4CD28+CD57-cells/ $\mu$ L                           | 599.1(55-1462)  | 603(367-1319)   | 956(425-1569)   | 0.019    | 0.022      | 0.024          | NS              |
| CD4CD45-CD57-cells/ $\mu$ L                           | 287.18 (39-884) | 393(160-738)    | 561(208-991)    | 0.002    | 0.001      | NS             | NS              |
| <b><u>Memory cells</u></b>                            |                 |                 |                 |          |            |                |                 |
| CD45RA-CCR7-cells/ $\mu$ L                            | 1.68(0-73.5)    | 3(0-86)         | 11(1-590)       | 0.01     | 0.008      | NS             | NS              |
| <b><u>Senescent/Advanced differentiated cells</u></b> |                 |                 |                 |          |            |                |                 |

|                            |             |          |           |       |       |    |    |
|----------------------------|-------------|----------|-----------|-------|-------|----|----|
| CD45RA+CCR7-cells/ $\mu$ L | 6.93(0-181) | 14(1-95) | 23(1-487) | 0.034 | 0.029 | NS | NS |
|----------------------------|-------------|----------|-----------|-------|-------|----|----|

\*Kruskal-Wallis test and Dunn test was performed to estimate differences between two groups, SLE vs. HC, ESKD-HD vs. HC and SLE vs. ESKD-HD,

Suppl Table S4. CD8 Lymphocytes and subpopulations in SLE and ESKD-HD female patients and female HC

|                               | SLE              | ESKD-HD          | HC               | p        | p          | p              | P              |
|-------------------------------|------------------|------------------|------------------|----------|------------|----------------|----------------|
| n                             | 29               | 19               | 17               | KW test* | SLE vs. HC | ESKD-HD vs. HC | SLE vs ESKD-HD |
| CD8%                          | 29.3(12.8-58.5)  | 21.2 (11.1-33.6) | 21.7 (10.8-52.4) | 0.023    | NS         | NS             | 0.034          |
| CD45RA+CCR7-cells/ $\mu$ L    | 10.84(0-279.6)   | 36 (1-205)       | 133 (0-534)      | 0.041    | 0.039      | NS             | NS             |
| CD8CD45RA+CD28- %             | 8.6(1.3-35.7)    | 13.4 (1.5-75.1)  | 20.5 (2-59)      | 0.029    | 0.027      | NS             | NS             |
| CD8CD45RA+CD28-cells/ $\mu$ L | 49.5(2.13-263.6) | 102 (6-716)      | 262 (9-783)      | 0.001    | 0.001      | NS             | NS             |

\*Kruskal-Wallis test and Dunn test was performed to estimate differences between two groups, SLE vs. HC, ESKD-HD vs. HC and SLE vs. ESKD-HD

Suppl Table S5. Heatmap/table showing the correlation of Age and Sex in the peripheral count of B lymphocytes and their subpopulations

|                 | B lymphocytes - Correlation Coefficient |         |                 |                 |                 |                 |
|-----------------|-----------------------------------------|---------|-----------------|-----------------|-----------------|-----------------|
|                 | Age                                     | CD19    | CD19 IgD+ CD27- | CD19 IgD+ CD27+ | CD19 IgD- CD27+ | CD19 IgD- CD27- |
| Age             | 1                                       | -0.2610 | -0.2910         | -0.0600         | -0.0790         | -0.2210         |
| CD19            | -0.2610                                 | 1       | 0.9150          | 0.6810          | 0.6880          | 0.6910          |
| CD19 IgD+ CD27- | -0.2910                                 | 0.9150  | 1               | 0.5920          | 0.4580          | 0.4650          |
| CD19 IgD+ CD27+ | -0.0600                                 | 0.6810  | 0.5920          | 1               | 0.7060          | 0.4010          |
| CD19 IgD- CD27+ | -0.0790                                 | 0.6880  | 0.4580          | 0.7060          | 1               | 0.6720          |
| CD19 IgD- CD27- | -0.2210                                 | 0.6910  | 0.4650          | 0.4010          | 0.6720          | 1               |
|                 | B lymphocytes - Significance (2-tailed) |         |                 |                 |                 |                 |
|                 | Age                                     | CD19    | CD19 IgD+ CD27- | CD19 IgD+ CD27+ | CD19 IgD- CD27+ | CD19 IgD- CD27- |
| Age             | .                                       | 0.0080  | 0.0030          | 0.5440          | 0.4270          | 0.0250          |
| CD19            | 0.0080                                  | .       | 0.0000          | 0.0000          | 0.0000          | 0.0000          |
| CD19 IgD+ CD27- | 0.0030                                  | 0.0000  | .               | 0.0000          | 0.0000          | 0.0000          |
| CD19 IgD+ CD27+ | 0.5440                                  | 0.0000  | 0.0000          | .               | 0.0000          | 0.0000          |
| CD19 IgD- CD27+ | 0.4270                                  | 0.0000  | 0.0000          | 0.0000          | .               | 0.0000          |
| CD19 IgD- CD27- | 0.0250                                  | 0.0000  | 0.0000          | 0.0000          | 0.0000          | .               |

Suppl Table S6. Heatmap/table showing the correlation of Age and Sex in the peripheral count of T lymphocytes and their subpopulations

|                  | T lymphocytes - Correlation Coefficient |        |          |                     |                     |                     |          |                   |                   |                    |
|------------------|-----------------------------------------|--------|----------|---------------------|---------------------|---------------------|----------|-------------------|-------------------|--------------------|
|                  | Age                                     | CD4    | CD4CD31+ | CD4<br>CD45RA+CCR7+ | CD4<br>CD45RA-CCR7+ | CD4<br>CD45RA-CCR7- | CD4CD28- | CD4<br>CD45+CD57+ | CD4<br>CD28-CD57+ | CD8<br>D45RA+CCR7- |
| Age              | 1                                       | -0.229 | -0.415   | -0.232              | -0.092              | -0,11               | -0.044   | 0.059             | 0.131             | -0.088             |
| CD4              | -0.229                                  | 1      | 0.685    | 0.742               | 0.73                | 0.25                | 0.166    | 0.261             | 0.126             | 0.297              |
| CD4 CD31+        | -0.415                                  | 0.685  | 1        | 0.851               | 0,292               | 0.051               | 0.086    | 0.226             | -0.011            | 0.22               |
| CD4 CD45RA+CCR7+ | -0.232                                  | 0.742  | 0.851    | 1                   | 0.445               | -0.022              | 0.095    | 0.32              | 0.094             | 0.212              |
| CD4 CD45RA-CCR7+ | -0.092                                  | 0.73   | 0.292    | 0.445               | 1                   | 0.14                | 0.094    | 0.245             | 0.139             | 0,086              |
| CD4CD45RA-CCR7-  | -0.11                                   | 0.25   | 0.051    | -0.022              | 0.14                | 1                   | 0.31     | 0.083             | 0.194             | 0.513              |
| CD4CD28-         | -0.044                                  | 0.166  | 0.086    | 0.095               | 0.094               | 0.1                 | 1        | 0.673             | 0.863             | 0.322              |
| CD4CD45+CD57+    | 0.059                                   | 0.261  | 0.226    | 0.32                | 0.245               | 0.083               | 0.673    | 1                 | 0.798             | 0.333              |
| CD4CD28-CD57+    | 0.131                                   | 0.126  | -0.011   | 0.094               | 0.139               | 0.194               | 0.863    | 0.798             | 1                 | 0.315              |
| CD8D45RA+CCR7-   | -0.088                                  | 0.297  | 0.22     | 0.212               | 0.086               | 0.513               | 0.322    | 0.333             | 0.315             | 1                  |
|                  | T lymphocytes - Significance (2-tailed) |        |          |                     |                     |                     |          |                   |                   |                    |
|                  | Age                                     | CD4    | CD4CD31+ | CD4CD45RA+CCR7+     | CD4CD45RA-CCR7+     | CD4CD45RA-CCR7-     | CD4CD28- | CD4<br>CD45+CD57+ | CD4<br>CD28-CD57+ | CD8<br>D45RA+CCR7- |
| Age              | .                                       | 0.0190 | 0.0000   | 0.0180              | 0.3530              | 0.2700              | 0.6570   | 0.5570            | 0.1840            | 0.3720             |
| CD4              | 0.0190                                  | .      | 0.0000   | 0.0000              | 0.0000              | 0.0080              | 0.0780   | 0.0050            | 0.1810            | 0.0010             |
| CD4 CD31+        | 0.0000                                  | 0.0000 | .        | 0.0000              | 0.0020              | 0.5920              | 0.3640   | 0.0160            | 0.9080            | 0.0190             |
| CD4 CD45RA+CCR7+ | 0.0180                                  | 0.0000 | 0.0000   | .                   | 0.0000              | 0.8130              | 0.3150   | 0.0010            | 0.3230            | 0.0240             |
| CD4 CD45RA-CCR7+ | 0.3530                                  | 0.0000 | 0.0020   | 0.0000              | .                   | 0.1390              | 0.3230   | 0.0090            | 0.1430            | 0.3680             |
| CD4CD45RA-CCR7-  | 0.2700                                  | 0.0080 | 0.5920   | 0.8130              | 0.1390              | .                   | 0.0010   | 0.3830            | 0.0390            | 0.0000             |
| CD4CD28-         | 0.6570                                  | 0.0780 | 0.3640   | 0.3150              | 0.3230              | 0.0010              | .        | 0.0000            | 0.0000            | 0.0000             |
| CD4CD45+CD57+    | 0.5570                                  | 0.0050 | 0.0160   | 0.0010              | 0.0090              | 0.3830              | 0.0000   | .                 | 0.0000            | 0.0000             |
| CD4CD28-CD57+    | 0.1840                                  | 0.1810 | 0.9080   | 0.3230              | 0.1430              | 0.0390              | 0.0000   | 0.0000            | .                 | 0.0010             |
| CD8D45RA+CCR7-   | 0.3720                                  | 0.0010 | 0.0190   | 0.0240              | 0.3680              | 0.0000              | 0.0000   | 0.0000            | 0.0010            | .                  |

**Suppl Table S7. Adjustment of Age and Sex in the expression of CD19, CD4 and CD8 lymphocytes and their subpopulations**

|                                                | Type II ANOVA      |                  |       | Type III ANOVA |           |               |
|------------------------------------------------|--------------------|------------------|-------|----------------|-----------|---------------|
| cells/ $\mu$ L                                 | Group <sup>^</sup> | Age              | Sex   | Group*Age      | Group*Sex | Group*Age*Sex |
| <b>CD19</b>                                    | <b>&lt;0.001</b>   | <b>0.022</b>     | 0.703 | <b>0.013</b>   | 0.232     | 0.300         |
| CD19IgD+CD27-                                  | <b>0.003</b>       | <b>0.002</b>     | 0.921 | 0.054          | 0.067     | 0.217         |
| CD19IgD+CD27+                                  | <b>0.021</b>       | 0.599            | 0.413 | 0.116          | 0,976     | 0,710         |
| CD19IgD-CD27+                                  | <b>&lt;0.001</b>   | 0.813            | 0.790 | <b>0.003</b>   | 0.299     | 0.100         |
| CD19IgD-CD27-                                  | <b>0.023</b>       | 0.586            | 0.169 | 0.313          | 0.753     | 0.894         |
|                                                |                    |                  |       |                |           |               |
| <b>CD4</b>                                     | <b>&lt;0.001</b>   | <b>0.027</b>     | 0.772 | 0.685          | 0.937     | 0.947         |
| <i>Early differentiated cells</i>              | -                  |                  |       |                |           |               |
| CD4CD31+                                       | <b>0.003</b>       | <b>&lt;0.001</b> | 0.165 | 0.117          | 0.923     | 0.621         |
| CD4CD45RA+CCR7+*                               | <b>0.026</b>       | 0.105            | 0.373 | 0.343          | 0.898     | 0.735         |
| CD4CD45RA+CD28+                                | <b>&lt;0.001</b>   | <b>0.008</b>     | 0.294 | 0.192          | 0.822     | 0.614         |
| CD4CD28+CD57-                                  | <b>&lt;0.001</b>   | <b>0.021</b>     | 0.479 | 0.439          | 0.964     | 0.903         |
| CD4CD45RA+CD57-                                | <b>0.005</b>       | <b>0.015</b>     | 0.547 | 0.179          | 0.746     | 0.778         |
| CD4CD45RA-CD57-                                | <b>&lt;0.001</b>   | 0.170            | 0.927 | 0.661          | 0.689     | 0.607         |
| <i>Memory cells</i>                            | -                  |                  |       |                |           |               |
| CD4CD45RA-CCR7+                                | 0.122              | 0.361            | 0.475 | 0.798          | 0.521     | 0.583         |
| CD4CD45RA-CCR7- *                              | 0.076              | 0.245            | 0.657 | 0.997          | 0.112     | 0.502         |
| <i>Senescent/Advanced differentiated cells</i> | -                  |                  |       |                |           |               |
| CD4CD45RA+CCR7-                                | <b>0.049</b>       | 0.089            | 0.898 | 0.863          | 0.195     | 0.529         |
| CD4CD28-*                                      | 0.764              | 0.321            | 0.110 | 0.848          | 0.677     | 0.785         |
| CD4CD28-CD57-                                  | 0.598              | 0.06             | 0.139 | 0.466          | 0.299     | 0.699         |
| CD4CD28-CD57+                                  | 0.883              | 0.087            | 0.184 | 0.529          | 0.706     | 0.786         |
|                                                |                    |                  |       |                |           |               |
| <b>CD8 *</b>                                   | <b>0.046</b>       | 0.558            | 0.258 | 0.892          | 0.222     | 0.821         |
| <i>Early differentiated cells</i>              | -                  |                  |       |                |           |               |
| CD8+CD31+                                      | 0.096              | 0.813            | 0.276 | 0.972          | 0.271     | 0.692         |
| CD8CD45RA+CD28+ *                              | <b>0.01</b>        | <b>0.03</b>      | 0.184 | 0.780          | 0.085     | 0.501         |
| CD8CD28+CD57-                                  | <b>0.001</b>       | <b>0.023</b>     | 0.807 | 0.199          | 0.466     | 0.857         |
| CD8CD45RA+CD57- *                              | <b>0.036</b>       | 0.133            | 0.887 | 0.876          | 0.128     | 0.417         |
| CD8CD45RA-CD57-                                | 0.366              | 0.612            | 0.329 | 0.600          | 0.105     | 0.632         |
| <i>Memory cells</i>                            | -                  |                  |       |                |           |               |
| CD8CD45RA-CCR7+                                | 0.231              | 0.215            | 0.120 | 0.929          | 0.067     | 0.344         |
| CD8CD45RA-CCR7- *                              | <b>0.025</b>       | 0.589            | 0.617 | 0.863          | 0.942     | 0.961         |
| <i>Senescent/Advanced differentiated cells</i> | -                  |                  |       |                |           |               |

|                   |              |              |       |       |              |       |
|-------------------|--------------|--------------|-------|-------|--------------|-------|
| CD8CD45RA+CCR7-   | <b>0.008</b> | 0.169        | 0.180 | 0.932 | <b>0.003</b> | 0.194 |
| CD8CD28-          | 0.690        | <b>0.033</b> | 0.125 | 0.891 | 0.201        | 0.701 |
| CD8CD28-CD57+     | 0.529        | <b>0.006</b> | 0.102 | 0.648 | 0.739        | 0.804 |
| CD8CD45RA+CD28-   | <b>0.001</b> | 0.333        | 0.350 | 0.881 | 0.506        | 0.926 |
| CD8CD45RA+CD57+ * | 0.072        | <b>0.018</b> | 0.666 | 0.476 | 0.989        | 0.983 |

\*Lymphocyte subpopulations which showed different significance after corrected for age and gender, compared to results from Kruskal Wallis H test, described on tables 2, 3 and 4

^Group: SLE, ESKD-HD and HC

### Legends for Supplement Figures

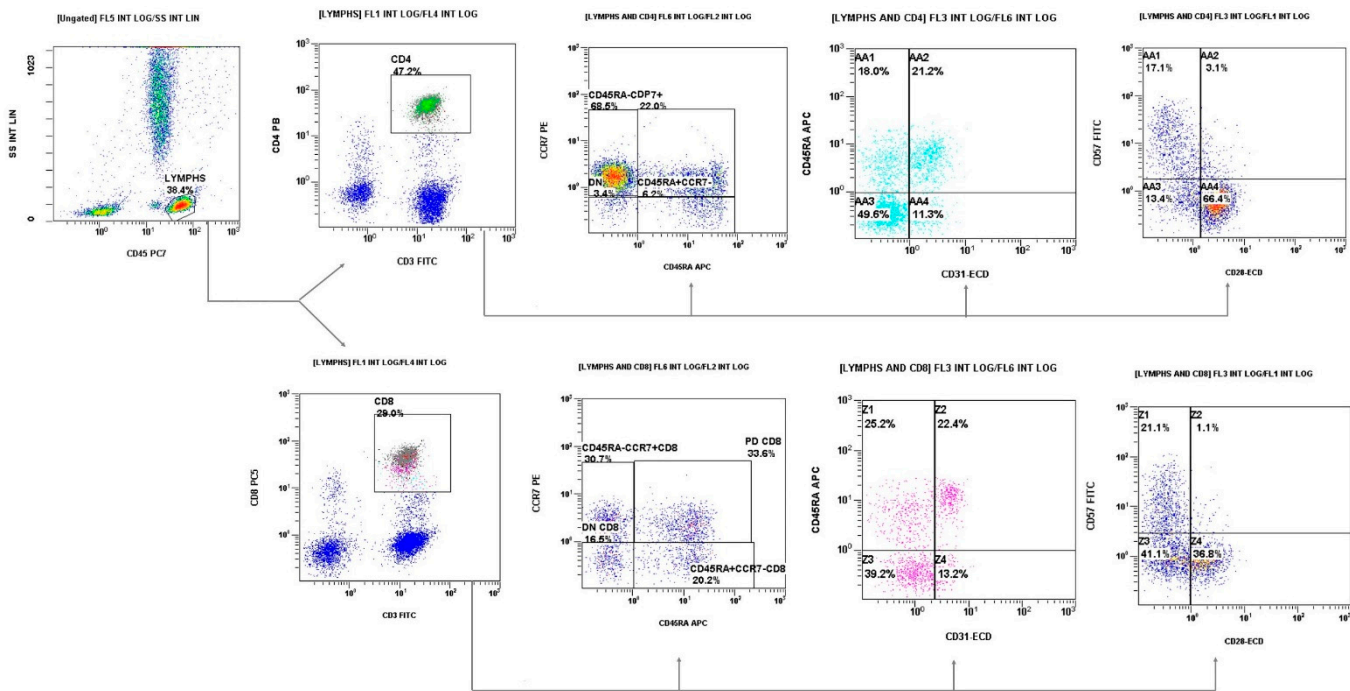

**Suppl Figure S1.** Description of gating process for T lymphocytes. Gating of Lymphocytes, CD3+CD8+ cells, CD8+CD45RA+CCR7+ cells, CD8CD28+CD57+ cells, CD8CD45RA+CD31+ cells

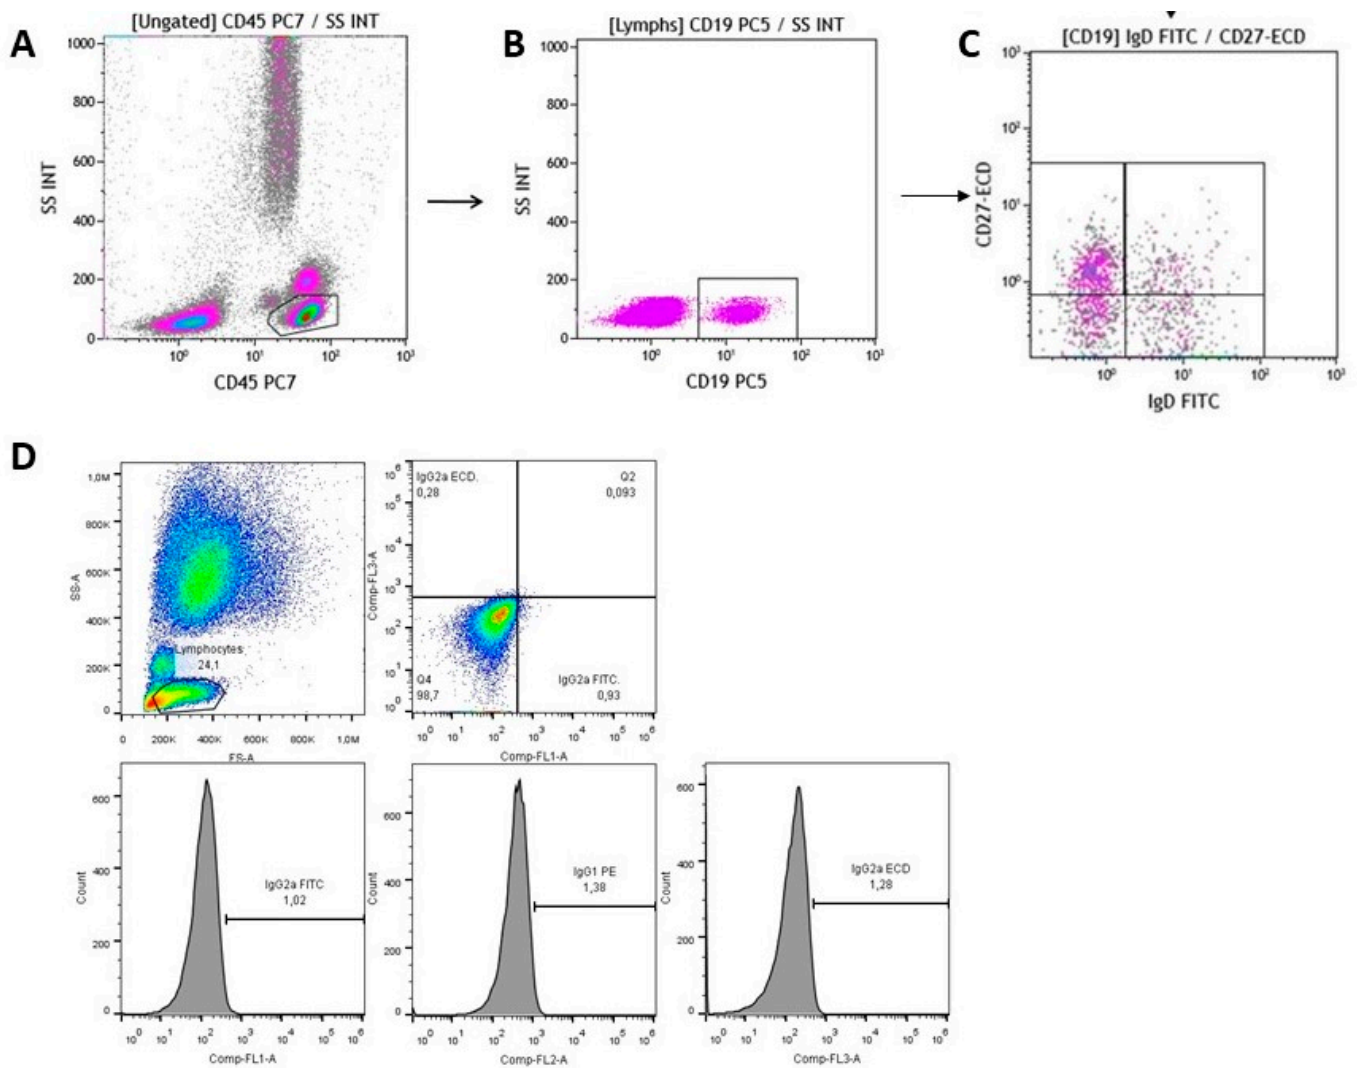

**Suppl Figure S2.** Description of gating process for B lymphocytes. Gating of lymphocytes (A), CD19+ cells (B) CD19IgD<sup>+</sup>CD27<sup>+</sup> cells (C) and isotype control for IgD FITC and CD27 ECD (D)

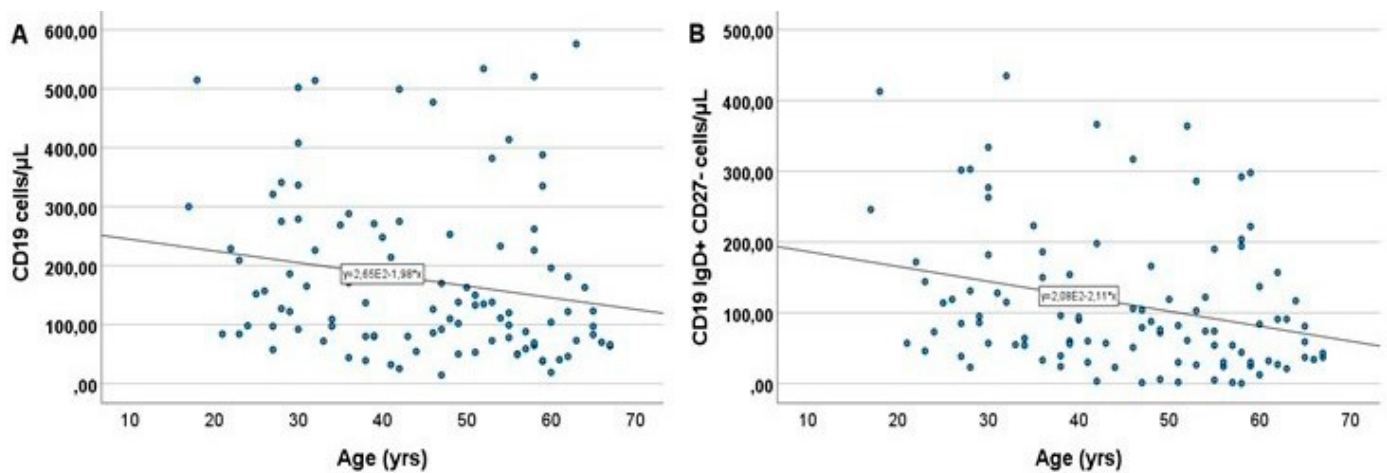

**Suppl Figure S3.** Correlation of Age with CD19 (A) and CD19IgD<sup>+</sup>CD27<sup>-</sup> cells (B) in the whole cohort of participants

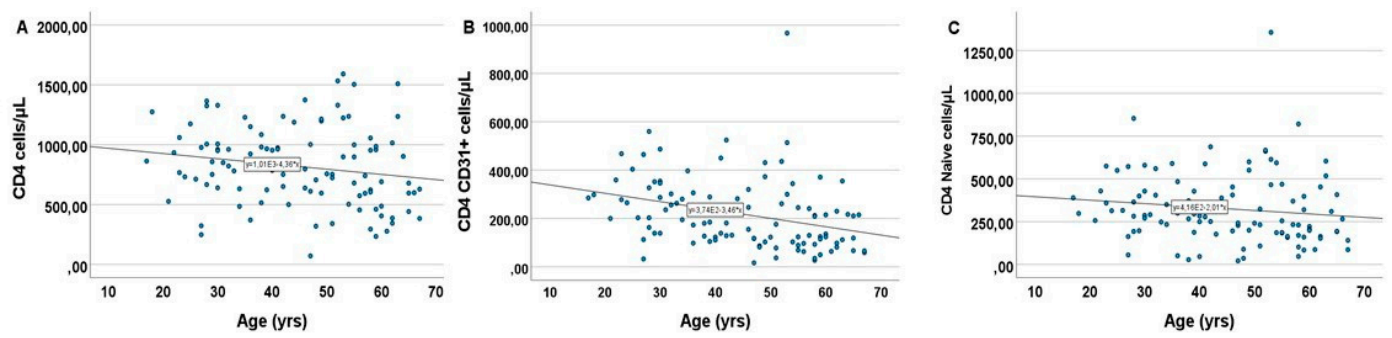

**Suppl Figure S4.** Correlation of Age with CD4 (A) and CD4CD31+ (B) and naïve CD4 cells (C) in the whole cohort of participants

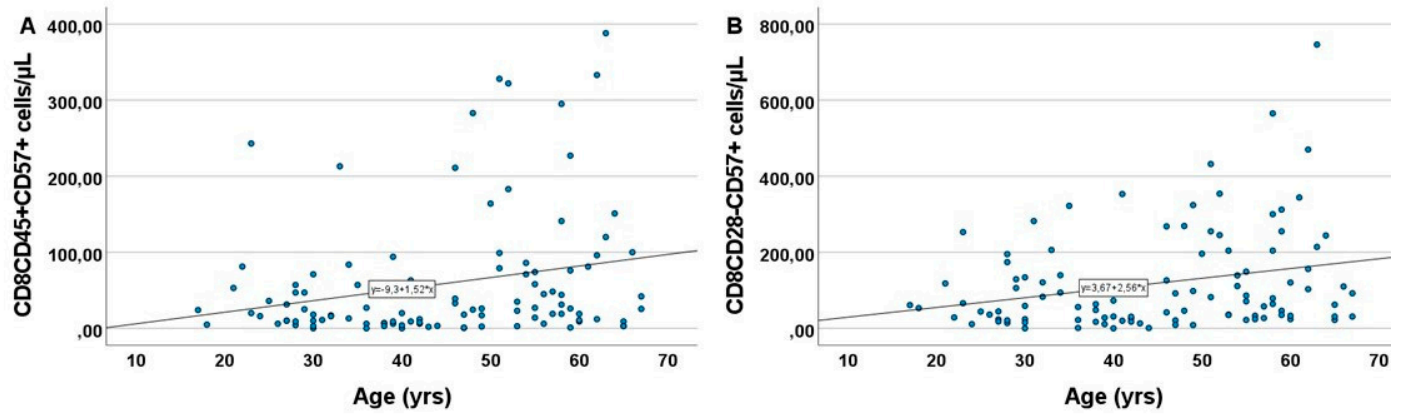

**Suppl Figure S5.** Correlation of Age with CD8CD45RA+CD57+ (A) and CD8CD28-CD57+ (B) cells in the whole cohort of participants
